# Supplementary material for: Stable anchoring of bacteria-based protein nanoparticles for surface enhanced cell guidance
Source: Royal Society of Chemistry journal article supplement (doi:10.1039/d0tb00702a), 2020-01-01
Supplement: d0tb00702a1.pdf [file d0tb00702a1.pdf]

## Supporting information

### Stable Anchoring of Bacteria-based Protein Nanoparticles for Surface Enhanced Cell Guidance

Marc Martínez-Miguel, Adriana R. Kyvik, Lena M. Ernst, Albert Martínez-Moreno, Olivia Cano-Garrido, Elena Garcia-Fruitós, Esther Vazquez, Nora Ventosa, Judith Guasch,\* Jaume Veciana, Antoni Villaverde, and Imma Ratera\*

\* E-mail: iratera@icmab.es

#### S1. Size and Surface Charge Determination of IB-like pNPs

IB-like pNPs were resuspended in ultrapure water and sonicated for 10 min. The resulting suspensions of IB-like pNPs (20 µg/ml) were dispensed into disposable plastic cuvettes before analysis in a dynamic light scattering (DLS) equipment Zetasizer Nanoseries Nano-ZS (Malvern Instruments, UK). Size distribution and Z-potential were measured for both *E. coli* and *L. lactis* produced samples. The size measurement through DLS of *E. coli* and *L. lactis* produced nanoparticles yielded average values of 320 and 1080 nm, while the Z-potential measurements yielded values of -36.9 and -36.8 mV, respectively.

**Figure S1** shows representative images of isolated pNPs by High Resolution Scanning Electron Microscopy (HRSEM) showing round morphologies and average sizes of 350 and 520 nm for *E. coli* and *L. lactis* produced pNPs, N(particles) = 24 and N(particles) = 125, respectively.

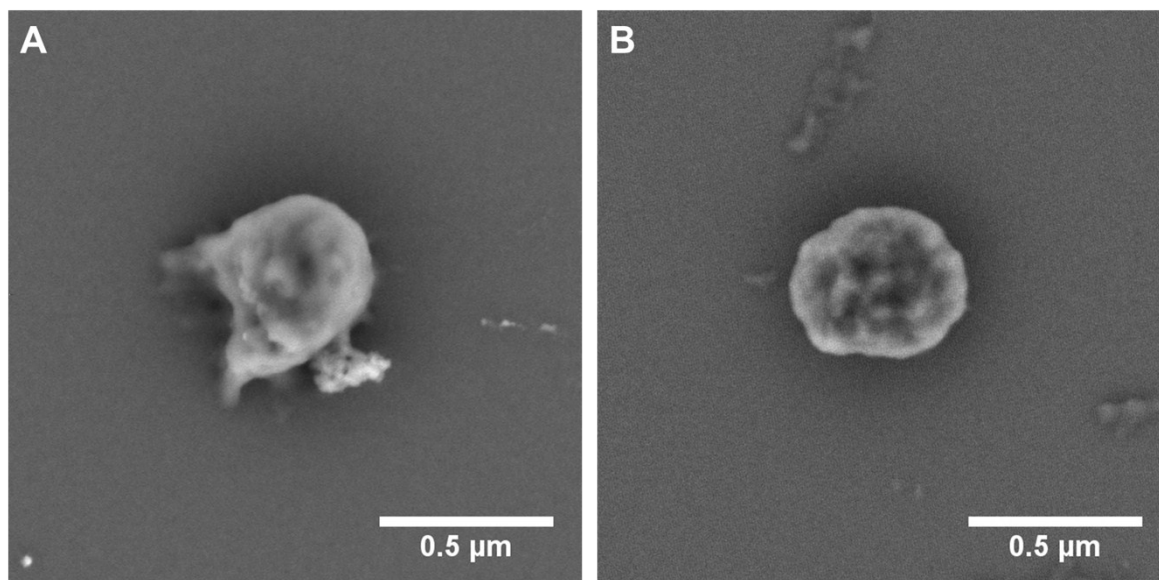

**Figure S1.** HRSEM images of **a)** *E. coli*-produced IB-like pNPs and **b)** *L. lactis*-produced IB-like pNPs. Images were acquired operating at 2 kV with a vCD back-scattered electron detector.

## S2. Contact Angle Measurement of Deposited IB-like pNPs

Upon deposition for 2 h on HO-terminated and maleimide-terminated SAMs, *E. coli* and *L. lactis* produced pNPs showed differential increase of wettability of the surface. Contact angle measurements revealed that deposition of *L. lactis* produced pNPs increased the contact angle by 4° respect to *E. coli* produced pNPs, (**Figure S2**) thus indicating that the deposited material in the first case is denser and more hydrophobic than in the second one.

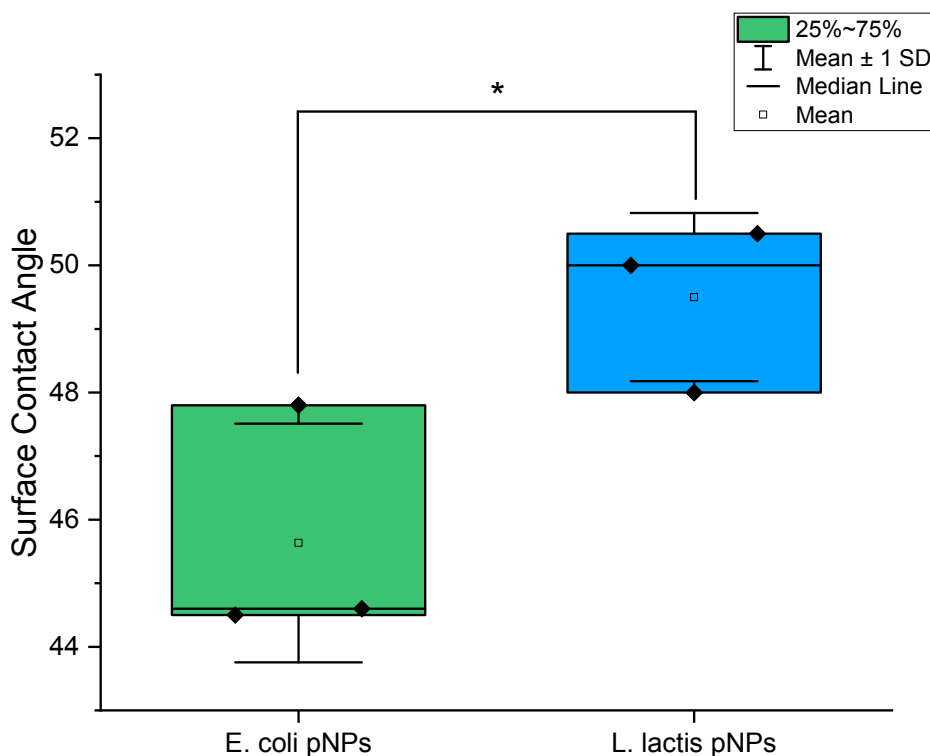

**Figure S2.** Surface contact angle measurements with H<sub>2</sub>O of surfaces with deposited *Coli* pNPs and *Lactis* pNPs.

## S3. Comparative Colorimetric Determination of Accessible Sulfhydryl Groups on pNPs

The quantity of accessible thiol groups of pNPs was assessed by the 4,4'-dithiopyridine (DTDP) method. After dilution of suspensions of pNPs in 1 ml of PBS and 0.2 ml of a buffer at pH 6.8, DTDP was added and the absorbance at 324 nm was measured for 10 min to monitor the reaction. The difference of absorbance after 10 min showed a higher increase of absorbance in *Lactis*-produced pNPs in comparison to *Coli*-produced pNPs, (**Figure S3**) hinting that LAB-produced pNPs feature a higher quantity of accessible

thiol groups on their surface, and thus being able to be covalently anchored to maleimide-functionalized surfaces through the thiol-maleimide reaction.

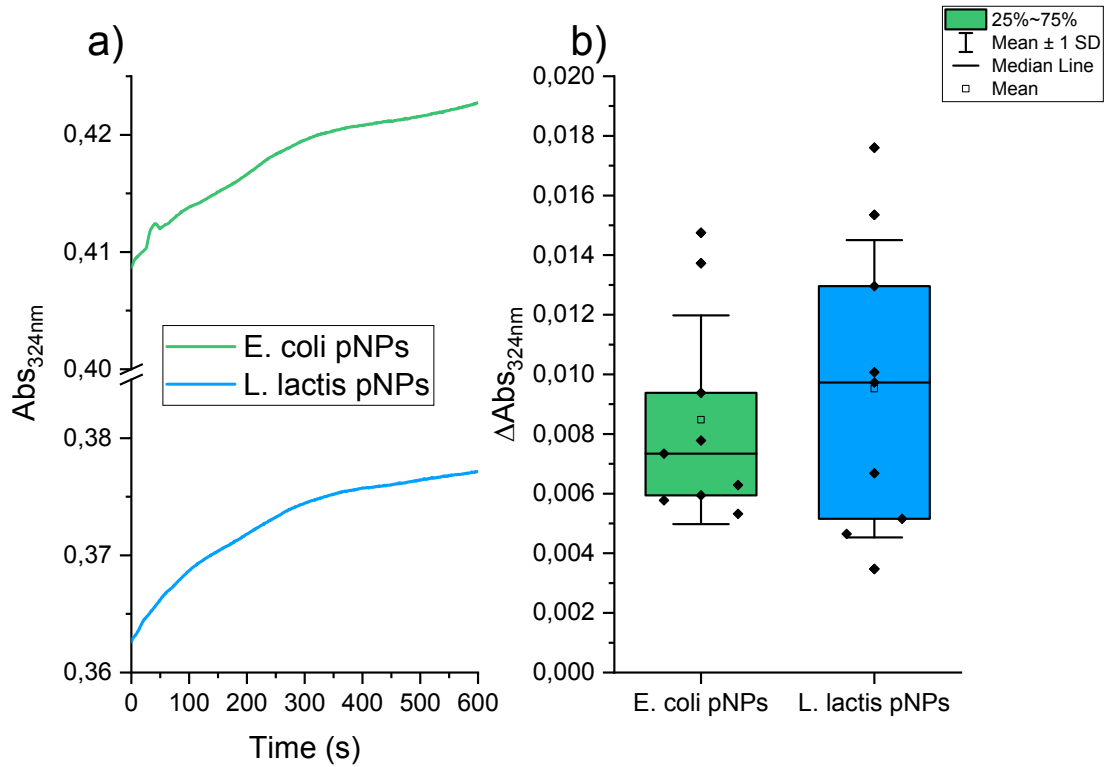

**Figure S3. a)** Time-course of the absorption at 324 nm during 10 min of Coli pNPs and Lactis pNPs suspensions after addition of DTDP. Average of 9 measurements. **b)** Difference of absorption at 324 nm after 10 min of both Coli- and Lactis-pNPs after addition of DTDP. N(measurements) = 9.

#### S4. Specific Fluorescence of GFP IB-like pNPs

The specific fluorescence of *E. coli* produced and *L. lactis* produced IB-like pNPs was measured in order to be able to better understand the retention and coverage analysis. *E. coli* produced IB-like pNPs ( $12.30 \pm 0.95$  UE/ $\mu$ g) featured a higher specific fluorescence than its *L. lactis* produced counterparts ( $6.32 \pm 0.05$  UE/ $\mu$ g). This result is remarkable when taking into account that the fluorescence intensity in previous experiments was higher for *L. lactis*, corroborating that indeed a higher amount of material was present in our samples in comparison to *E. coli* produced pNPs.
